# Supplementary material
Source: publisher site journal article supplement (https://www.spandidos-publications.com/6926/downloadSupplementary)
Supplement: Supplementary file 1 [file downloadSupplementary]

## Sheet: Sheet1
Table SII. Analysis of gut microbial species structure at the genus level.
	Control	APS2.5	APS5	APS10	Asthma	DXM
Others	0.363772949300993	0.452487648847226	0.367517523145545	0.304680924531152	0.38914905609174	0.337850562058176
Barnesiella	0.110365504463534	0.0341477704585761	0.0989167510026613	0.0793534324621793	0.052835203985777	0.085025785143122
Alistipes	0.00669698500926394	0.0352799594628832	0.0279470744780539	0.0238398400126609	0.0220929504352485	0.0159491250434581
Butyricicoccus	0.0104160350345292	0.00304820116544211	0.00675437610105326	0.00212213421959413	0.015392002004022	0.00588133039749681
Clostridium_XlVa	0.15958901802257	0.272430010134279	0.294628734210428	0.327269065038019	0.343731516724537	0.27650220187739
Saccharibacteria	0.0214316995115378	0.00703065619457816	0.0114696952659395	0.0156390501471107	0.0085518853810773	0.005475721404566
Alloprevotella	0.0133670203806636	0.0151064099315936	0.0219648412609168	0.0275949385300444	0.00982527433529793	0.0111325182524047
Bacteroides	0.00565268654202459	0.00782239675703066	0.0099628921623749	0.0120565998374229	0.00471780169924362	0.0194909607138718
Pseudoflavonifractor	0.00710796698669362	0.00893875095008867	0.00877843997151317	0.00630165958089648	0.00926860156842552	0.00971288677714683
Lactobacillus	0.0888596934478693	0.0049483785153281	0.0074515536564339	0.00631604693153779	0.00291557361649421	0.00634488353227489
Oscillibacter	0.0194172140811858	0.0172520268558399	0.0140260129690018	0.0104739912668782	0.0235333412195309	0.0174774017846796
Anaerotruncus	0.00287687384200775	0.011100202685584	0.00446043704786536	0.00424426843918827	0.00326349409578947	0.00530188897902422
Prevotella	0.0798180899444164	0.0213374081580948	0.0695978110124068	0.112768054326636	0.0584228068832588	0.0358312087147989
Helicobacter	0.0435573521980798	0.0591034329870788	0.0226320326848832	0.0342562818769738	0.0207082269276534	0.123551396453819
Roseburia	0.00254000336870473	0.0183604636432734	0.00654447318115372	0.00115098805130529	0.00454384145959599	0.00137617336887241
Flavonifractor	0.00437257874347313	0.00693564732708386	0.00503767007758911	0.00555351734754804	0.00588681450967567	0.00893788387993974
Desulfovibrio	0.0522553478187637	0.0127945274892323	0.00607219161137974	0.0211134370661315	0.018537203136851	0.0272772047745973
Clostridium_IV	0.00790298130368873	0.0118761084367874	0.0162374901608006	0.00526577033472171	0.0066244059257816	0.00688086684436204
